# Supplementary material for: Tumor suppressor Tsc1 is a new Hsp90 co‐chaperone that facilitates folding of kinase and non‐kinase clients
Source: PubMed Central journal article supplement (PMC5730846; doi:10.15252/embj.201796700), 2017-11-10
Supplement: EMBJ-36-3650-s001.pdf [file EMBJ-36-3650-s001.pdf]

## **Appendix Table of Content**

Appendix Table S1  
Appendix References

page 2-8  
page 9

Table S1. List of antibodies, commercial assays, mammalian cell lines, yeast strains, oligonucleotides and recombinant DNA plasmids. Primer sequences with restriction sites in red, epitope sequences highlighted in green and mutation sites in blue.

| REAGENT or RESOURCE                      | SOURCE                    | IDENTIFIER                           |
|------------------------------------------|---------------------------|--------------------------------------|
| Antibodies                               |                           |                                      |
| Anti-rabbit Aha1<br>(1:4000)             | StressMarq<br>Biosciences | Cat# SPC-183<br>RRID:AB_1944037      |
| Anti-rabbit Hsp70<br>(1:20,000)          | StressMarq<br>Biosciences | Cat# SPC-103<br>RRID:AB_2570584      |
| Anti-rabbit Cdc37<br>(1:4000)            | StressMarq<br>Biosciences | Cat# SPC-142<br>RRID:AB_2570605      |
| Anti-rabbit FLAG tag<br>(1:8000)         | Thermo Scientific         | Cat# PA1-984B<br>RRID:AB_347227      |
| Anti-mouse 6x-His (HIS.H8)<br>(1:10,000) | Thermo Scientific         | Cat# MA1-21315<br>RRID:AB_557403     |
| Anti-mouse CFTR (M3A7)<br>(1:1000)       | EMD Millipore             | Cat# 05-583<br>RRID:AB_309819        |
| Anti-rat Hsp90 (16F1)<br>(1:8000)        | Enzo Life Sciences        | Cat# ADI-SPA-835<br>RRID:AB_11181205 |
| Anti-rabbit p23<br>(1:2000)              | Enzo Life Sciences        | Cat# ADI-SPA-670<br>RRID:AB_10617386 |
| Anti-mouse GAPDH (1D4)<br>(1:10,000)     | Enzo Life Sciences        | Cat# ADI-CSA-335<br>RRID:AB_10617247 |

|                                                   |                              |                                |
|---------------------------------------------------|------------------------------|--------------------------------|
| Anti-rabbit FLCN (D14G9)<br>(1:4000)              | Cell Signaling<br>Technology | Cat# 3697<br>RRID:AB_2231646   |
| Anti-rabbit HOP (D10E2)<br>(1:2000)               | Cell Signaling<br>Technology | Cat# 5670<br>RRID:AB_10828369  |
| Anti-rabbit PP5<br>(1:1000)                       | Cell Signaling<br>Technology | Cat# 2289<br>RRID:AB_2168757   |
| Anti-rabbit Phospho-Akt<br>S473 (D9E)<br>(1:2000) | Cell Signaling<br>Technology | Cat# 2289<br>RRID:AB_2315049   |
| Anti-mouse Akt (2H10)<br>(1:4000)                 | Cell Signaling<br>Technology | Cat# 2967<br>RRID:AB_331160    |
| Anti-rabbit GR (D6H2L)<br>(1:2000)                | Cell Signaling<br>Technology | Cat# 12041<br>RRID:AB_2631286  |
| Anti-rabbit Phospho-GR<br>S211<br>(1:2000)        | Cell Signaling<br>Technology | Cat# 4161<br>RRID:AB_2155797   |
| Anti-rabbit HA-Tag (C29F4)<br>(1:2000)            | Cell Signaling<br>Technology | Cat# 3724<br>RRID:AB_1549585   |
| Anti-rabbit ULK1 (D8H5)<br>(1:1000)               | Cell Signaling<br>Technology | Cat# 8054<br>RRID:AB_11178668  |
| Anti-rabbit ER $\alpha$ (D6R2W)<br>(1:2000)       | Cell Signaling<br>Technology | Cat# 13258 RRID:<br>AB_2632959 |
| Anti-rabbit TSC1<br>(1:1000)                      | Cell Signaling<br>Technology | Cat# 4906<br>RRID:AB_2209790   |

|                                              |                                             |                                |
|----------------------------------------------|---------------------------------------------|--------------------------------|
| Anti-rabbit TSC2 (D57A9)<br>(1:1000)         | Cell Signaling<br>Technology                | Cat# 3990<br>RRID:AB_2209986   |
| Anti-rabbit Src (32G6)<br>(1:2000)           | Cell Signaling<br>Technology                | Cat# 2123<br>RRID:AB_2106047   |
| Anti-rabbit Phospho-Src<br>Y416<br>(1:2000)  | Cell Signaling<br>Technology                | Cat# 2101<br>RRID:AB_331697    |
| Anti-rabbit c-Abl<br>(1:1000)                | Cell Signaling<br>Technology                | Cat# 2862<br>RRID:AB_2257757   |
| Anti-rabbit c-Abl Y89 (61A6)<br>(1:1000)     | Cell Signaling<br>Technology                | Cat# 3098<br>RRID:AB_2220865   |
| Anti-mouse Ubiquitin<br>(P4D1)<br>(1:1000)   | Santa Cruz Biotech                          | Cat# sc-8017<br>RRID:AB_628423 |
| Anti-rabbit Raf-1 (C-12)<br>(1:4000)         | Santa Cruz Biotech                          | Cat# sc-133<br>RRID:AB_632305  |
| Anti-rabbit Cdk4 (H-22)<br>(1:4000)          | Santa Cruz Biotech                          | Cat# sc-601<br>RRID:AB_631221  |
| Anti-rabbit ErbB2/Neu (C-<br>18)<br>(1:1000) | Santa Cruz Biotech                          | Cat# sc-284<br>RRID:AB_632013  |
| Anti-rabbit Sba1<br>(1:8000)                 | The Institute of Cancer<br>Research, London |                                |
| Anti-mouse secondary<br>(1:4000)             | Santa Cruz Biotech                          | Cat# sc-2005<br>RRID:AB_631736 |

|                                   |                                                                               |                                                      |
|-----------------------------------|-------------------------------------------------------------------------------|------------------------------------------------------|
| Anti-rabbit secondary<br>(1:4000) | Santa Cruz Biotech                                                            | Cat# sc-2004<br>RRID:AB_631746                       |
| Anti-rat secondary<br>(1:4000)    | Santa Cruz Biotech                                                            | Cat# sc-2006<br>RRID:AB_1125219                      |
| <b>Compounds</b>                  |                                                                               |                                                      |
| Ganetespib                        | Madrigal Pharma<br>(formerly Synta<br>Pharmaceuticals)                        | STA-9090 CAS# 888216-25-9<br>(Ying, Du et al., 2012) |
| Ganetespib,<br>Biotinylated       | Madrigal Pharma<br>(formerly Synta<br>Pharmaceuticals)                        | STA-12-7191                                          |
| SNX-2112                          | Duke University<br><br>Dr. Timothy<br>Haystead                                | CAS# 908112-43-6<br><br>(Barrott & Haystead, 2013)   |
| Bortezomib                        | LC Labs                                                                       | Cat# B-1408; CAS# 179324-69-7                        |
| JG-98                             | University of<br>California at San<br>Francisco<br><br>Dr. Jason<br>Gestwicki | (Li, Srinivasan et al., 2013)                        |
| DPH                               | Sigma-Aldrich                                                                 | Cat# SML0202-5MG CAS#<br>484049-04-9                 |
| GNF-5                             | Sigma-Aldrich                                                                 | Cat# SML0511-5MG CAS#<br>778277-15-9                 |
| <b>Critical Commercial Assays</b> |                                                                               |                                                      |
| Mirus TransIT-2020                | MirusBio                                                                      | Cat# MIR5405                                         |
| PiPer Phosphate Assay             | ThermoFisher<br>Scientific                                                    | Cat# P22061                                          |

|                                        |                                                       |                                     |
|----------------------------------------|-------------------------------------------------------|-------------------------------------|
| Anti-FLAG M2 affinity gel              | Sigma-Aldrich                                         | Cat# A2220<br>RRID:AB10063035       |
| Protein G agarose                      | ThermoFisher Scientific                               | Cat# 15-920-010                     |
| ATP agarose                            | Novus Biologicals                                     | Cat# 510-0002                       |
| Strep agarose                          | ThermoFisher Scientific                               | Cat# 20349                          |
| Ni-NTA Agarose                         | ThermoFisher Scientific                               | Cat# 88221                          |
| Experimental Models: Cell Lines        |                                                       |                                     |
| HEK293                                 | ATCC Cat# CRL-1573                                    | RRID:CVCL_0045                      |
| <i>TSC1</i> (+/+) MEF                  | Brigham and Women's Hospital<br>Dr. David Kwiatkowski | (Kwiatkowski, Zhang et al., 2002)   |
| <i>TSC1</i> (-/-) MEF                  | Brigham and Women's Hospital<br>Dr. David Kwiatkowski | (Kwiatkowski et al., 2002)          |
| <i>c-Abl</i> (+/+) MEF                 | Columbia University<br>Dr. Stephen Goff               | (Suzuki, Sukezane et al., 2004)     |
| <i>c-Abl</i> (-/-) MEF                 | Columbia University<br>Dr. Stephen Goff               | (Suzuki et al., 2004)               |
| Experimental Models: Organisms/Strains |                                                       |                                     |
| PP30-Hsp90α                            | University of Sheffield<br>Dr. Peter Piper            | (Piper, Millson et al., 2003)       |
| PP30-Hsp82                             | University of Sheffield<br>Dr. Peter Piper            | (Panaretou, Prodromou et al., 1998) |
| Oligonucleotides                       |                                                       |                                     |

|                     |                                                                         |                                                                                                   |
|---------------------|-------------------------------------------------------------------------|---------------------------------------------------------------------------------------------------|
| Tsc1 siRNA          | GE Dharmacon<br>Cat# L-003028-00-0005                                   | 1-CGACACGGCUGAU AACUGA<br>2-CGGCUGAUGUUGUUAAAUA<br>3-GUUACUGGGUCAUGUCAUA<br>4-CAAAGCCGCCACUCGUUUA |
| Non-targeting siRNA | GE Dharmacon<br>Cat# D-001810-10-20                                     | 1-UGGUUUACAUGUCGACUAA<br>2-UGGUUUACAUGUUGUGUGA<br>3-UGGUUUACAUGUUUUCUGA<br>4-UGGUUUACAUGUUUUCUA   |
| Primer Name         | Primer Sequence                                                         |                                                                                                   |
| Tsc1-A-KpnI-FLAG-F  | TATGCGGGTACCATGGATTACAAGGATGACGACGATAAGGGAGCCCAACAAGCAAATGTCTGGGGAGCTTC |                                                                                                   |
| Tsc1-A-ApaI-R       | TATGCGGGGCCCTTAATTCTGTGTGTCAGCATAAGGGC                                  |                                                                                                   |
| Tsc1-B-KpnI-FLAG-F  | TATGCGGGTACCATGGATTACAAGGATGACGACGATAAGGGAAGCTATGGGTGTGCTACTTC          |                                                                                                   |
| Tsc1-B-ApaI-R       | TATGCGGGGCCCTTATGGTCTTGCAGAATCCATTC                                     |                                                                                                   |
| Tsc1-C-KpnI-FLAG-F  | TATGCGGGTACCATGGATTACAAGGATGACGACGATAAGGGATGTCTACACAGACAACACC           |                                                                                                   |
| Tsc1-C-ApaI-R       | TATGCGGGGCCCTTAGTCATTACAACAGTCAAGCCT                                    |                                                                                                   |
| Tsc1-D-KpnI-FLAG-F  | TATGCGGGTACCATGGATTACAAGGATGACGACGATAAGGGAGACGGGTGCTCAGATTC             |                                                                                                   |
| Tsc1-D-ApaI-R       | TATGCGGGGCCCTTAGCTGTGTTTCATGATGAGTC                                     |                                                                                                   |
| Tsc1-D-HA-KpnI-F    | TATGCGGGTACCATGTACCCATACGATGTTCCAGATTACGCTGGGGACGGGTGCTCAGATTCC         |                                                                                                   |
| Tsc1-D-NotI-R       | TATGCGGGGCCCGCTTAGCTGTGTTTCATGATGAGTC                                   |                                                                                                   |

|                    |                                                                            |                                  |
|--------------------|----------------------------------------------------------------------------|----------------------------------|
| Hsp90a-TPR-BamHI-F | TATGCGGGATCCATGGATTACAAGGATGACGACGATA<br>AGGGACCTGAGGAAACCCAGAC            |                                  |
| Hsp90a-TPR-XhoI-R  | TATGCGCTCGAGTTAGCGTGATGTGTCGTCATC                                          |                                  |
| Hsp90B-TPR-NotI-F  | TATGCGGCGGCCGCATGGATTACAAGGATGACGACGA<br>TAAGGGACCTGAGGAAGTGAC             |                                  |
| Hsp90B-TPR-XbaI-R  | TATGCGTCTAGATTAGCGAGACGCATCCTCATC                                          |                                  |
| Hsp90-V410E-F      | AGCAAATTTTGAAGAAATCAGGAAGAATTTG                                            |                                  |
| Hsp90-V410E-R      | CAAATTCTTCTGATTTCTTTCAAATTTTGCT                                            |                                  |
| Aha1-F-Spe1        | TATGCACTAGTATGGCCAAGTGGGGTGAGGGA                                           |                                  |
| Aha1-R-Xho1        | TCGGTCTCGAGTTACTTGTTCATCGTCGTCCTTGATGTC<br>AAATAAGCGTGCGCCATAGCCAAAGGTCTGT |                                  |
| Tsc1-L117P-F       | TTGCCTTCTTTACCAAATGTCTCAAG                                                 |                                  |
| Tsc1-L117P-R       | CTTGAGACATTTTGGTAAAGAAGGCAA                                                |                                  |
| Recombinant DNA    |                                                                            |                                  |
| pcDNA3-FLAG-TSC2   | Addgene Cat#<br>14129                                                      | (Tee, Fingar et al., 2002)       |
| pcDNA3-HA3-TSC1    | Addgene Cat#<br>19911                                                      | (Tee et al., 2002)               |
| pcDNA3-cFLAG       | Addgene Cat#<br>20011                                                      | (Sanjabi, Williams et al., 2005) |
| pcDNA3.1-CFTR      | University of<br>Pittsburgh<br><br>Dr. Brodsky                             | (Ahner, Whyte et al., 2005)      |
| p424-ADH           | ATCC                                                                       | Cat# 87373                       |
| pYES2              | ThermoFisher<br>Scientific                                                 | Cat# V82520                      |



## Appendix References

Ahner A, Whyte FM, Brodsky JL (2005) Distinct but overlapping functions of Hsp70, Hsp90, and an Hsp70 nucleotide exchange factor during protein biogenesis in yeast. *Arch Biochem Biophys* 435: 32-41

Barrott JJ, Haystead TA (2013) Hsp90, an unlikely ally in the war on cancer. *FEBS J* 280: 1381-96

Kwiatkowski DJ, Zhang H, Bandura JL, Heiberger KM, Glogauer M, el-Hashemite N, Onda H (2002) A mouse model of TSC1 reveals sex-dependent lethality from liver hemangiomas, and up-regulation of p70S6 kinase activity in Tsc1 null cells. *Hum Mol Genet* 11: 525-34

Li X, Srinivasan SR, Connarn J, Ahmad A, Young ZT, Kabza AM, Zuiderweg ER, Sun D, Gestwicki JE (2013) Analogs of the Allosteric Heat Shock Protein 70 (Hsp70) Inhibitor, MKT-077, as Anti-Cancer Agents. *ACS Med Chem Lett* 4

Panaretou B, Prodromou C, Roe SM, O'Brien R, Ladbury JE, Piper PW, Pearl LH (1998) ATP binding and hydrolysis are essential to the function of the Hsp90 molecular chaperone in vivo. *EMBO J* 17: 4829-36

Piper PW, Millson SH, Mollapour M, Panaretou B, Siligardi G, Pearl LH, Prodromou C (2003) Sensitivity to Hsp90-targeting drugs can arise with mutation to the Hsp90 chaperone, cochaperones and plasma membrane ATP binding cassette transporters of yeast. *Eur J Biochem* 270: 4689-95

Sanjabi S, Williams KJ, Sacconi S, Zhou L, Hoffmann A, Ghosh G, Gerondakis S, Natoli G, Smale ST (2005) A c-Rel subdomain responsible for enhanced DNA-binding affinity and selective gene activation. *Genes Dev* 19: 2138-51

Suzuki J, Sukezane T, Akagi T, Georgescu MM, Ohtani M, Inoue H, Jat PS, Goff SP, Hanafusa H, Shishido T (2004) Loss of c-abl facilitates anchorage-independent growth of p53- and RB- deficient primary mouse embryonic fibroblasts. *Oncogene* 23: 8527-34

Tee AR, Fingar DC, Manning BD, Kwiatkowski DJ, Cantley LC, Blenis J (2002) Tuberous sclerosis complex-1 and -2 gene products function together to inhibit mammalian target of rapamycin (mTOR)-mediated downstream signaling. *Proc Natl Acad Sci U S A* 99: 13571-6

Ying W, Du Z, Sun L, Foley KP, Proia DA, Blackman RK, Zhou D, Inoue T, Tatsuta N, Sang J, Ye S, Acquaviva J, Ogawa LS, Wada Y, Barsoum J, Koya K (2012) Ganetespib, a unique triazolone-containing Hsp90 inhibitor, exhibits potent antitumor activity and a superior safety profile for cancer therapy. *Mol Cancer Ther* 11: 475-84
