# Supplementary material for: Tumor suppressor Tsc1 is a new Hsp90 co‐chaperone that facilitates folding of kinase and non‐kinase clients
Source: PubMed Central journal article supplement (PMC5730846; doi:10.15252/embj.201796700), 2017-11-10

# Source Data Fig 1

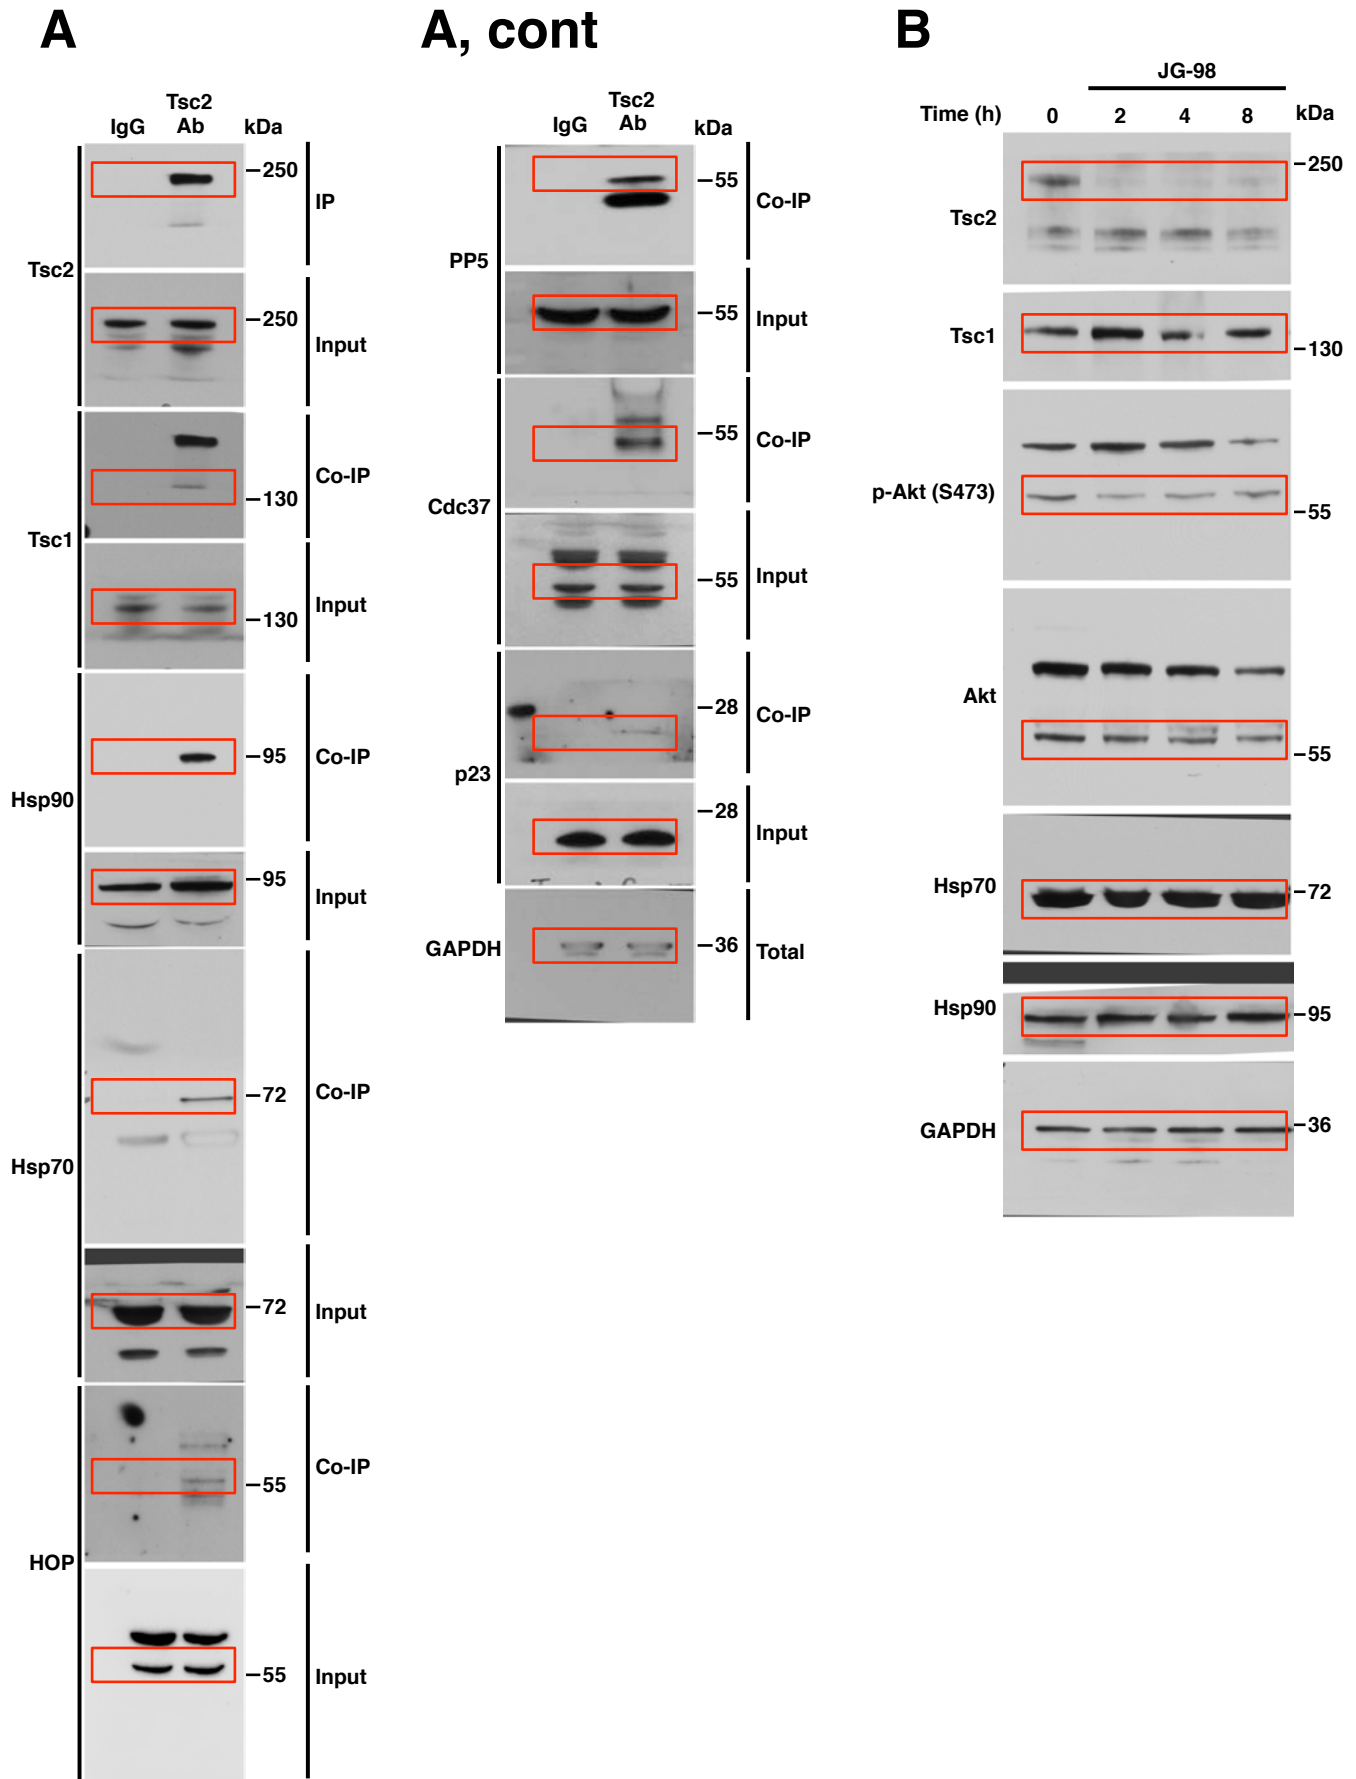

# Source Data Fig 1

## C

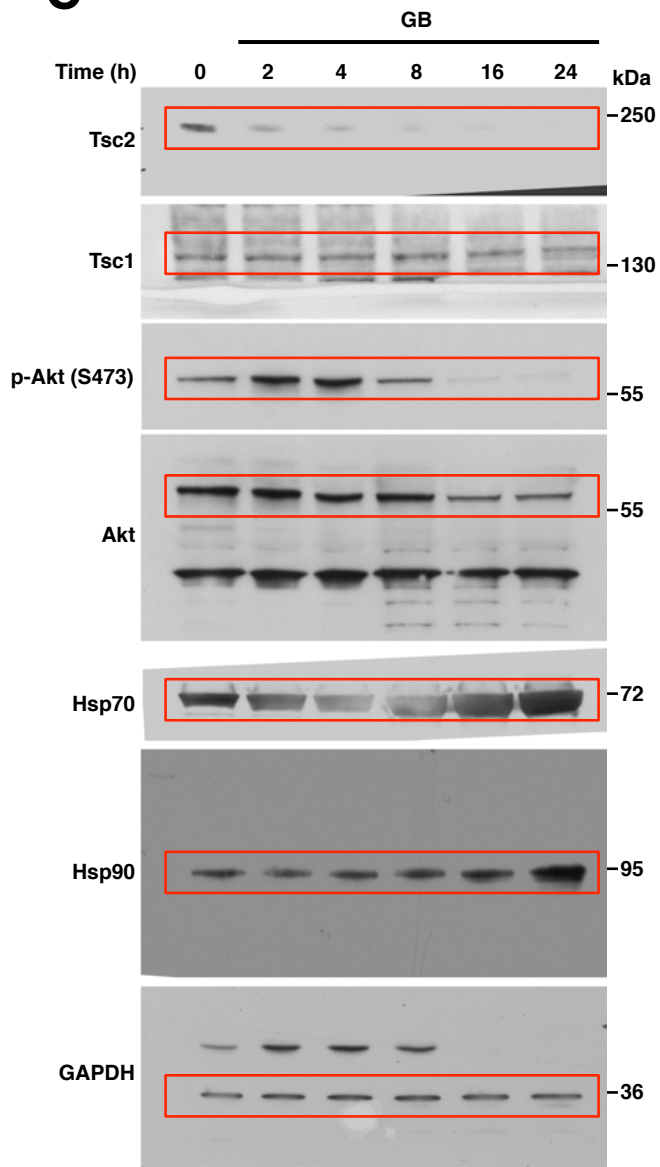

## D

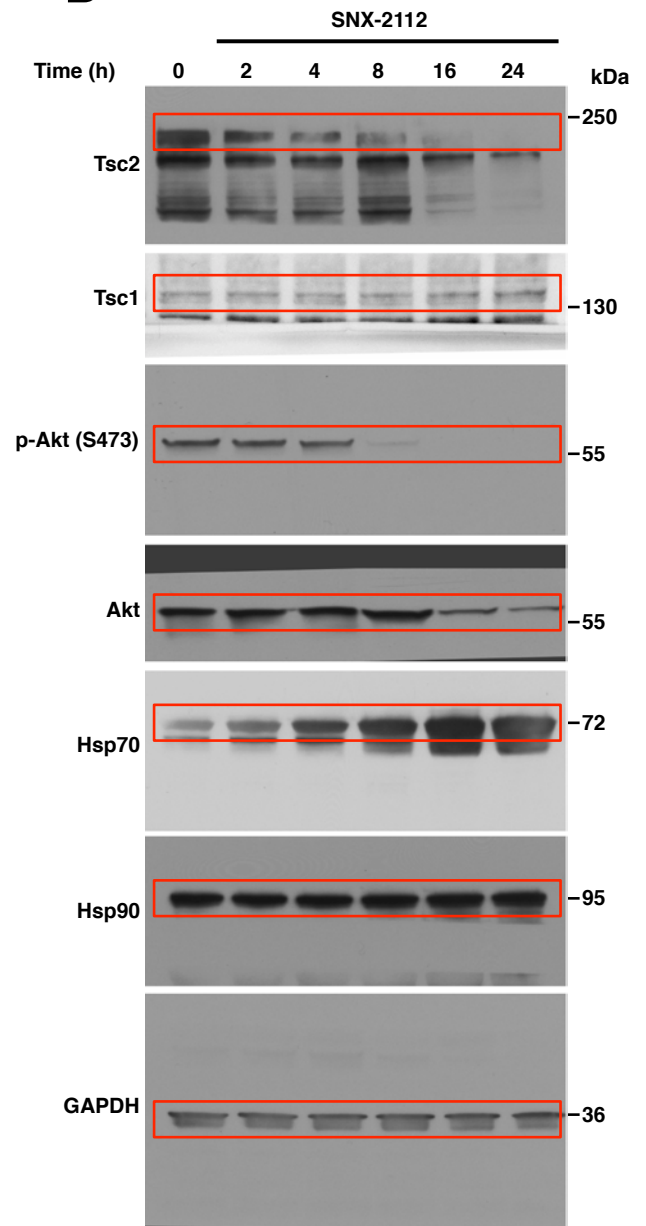

# Source Data Fig 1

## E

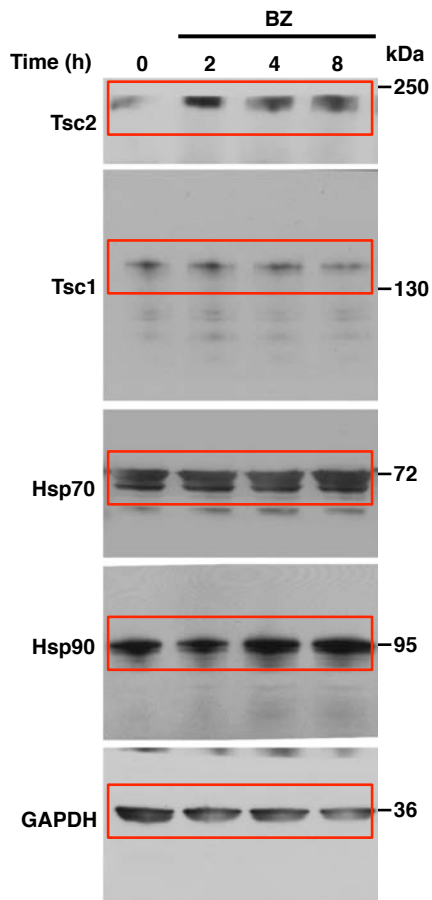

## F

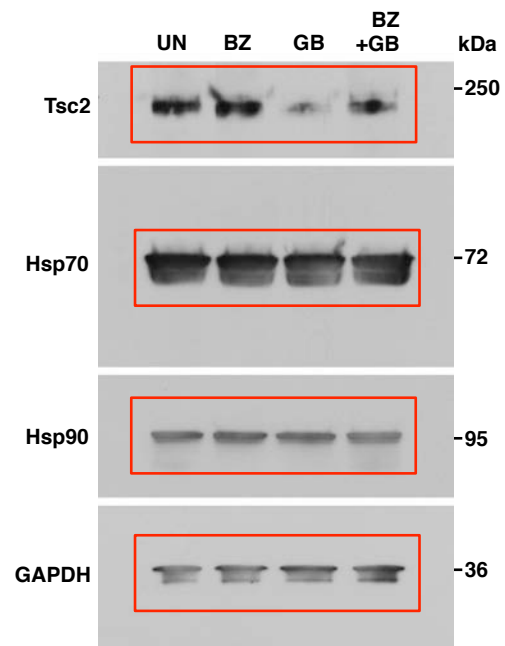

## G

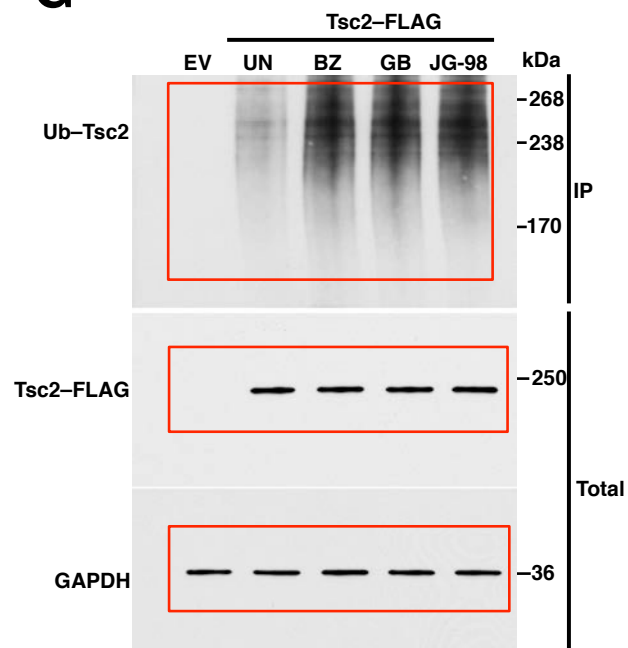

Supplement: EMBJ-36-3650-s003.pdf [file EMBJ-36-3650-s003.pdf]
