# Supplementary material for: Tumor suppressor Tsc1 is a new Hsp90 co‐chaperone that facilitates folding of kinase and non‐kinase clients
Source: PubMed Central journal article supplement (PMC5730846; doi:10.15252/embj.201796700), 2017-11-10

# Source Data Fig 4

**A**

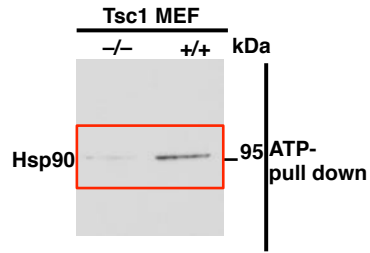

**B**

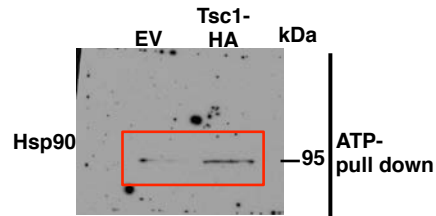

**C**

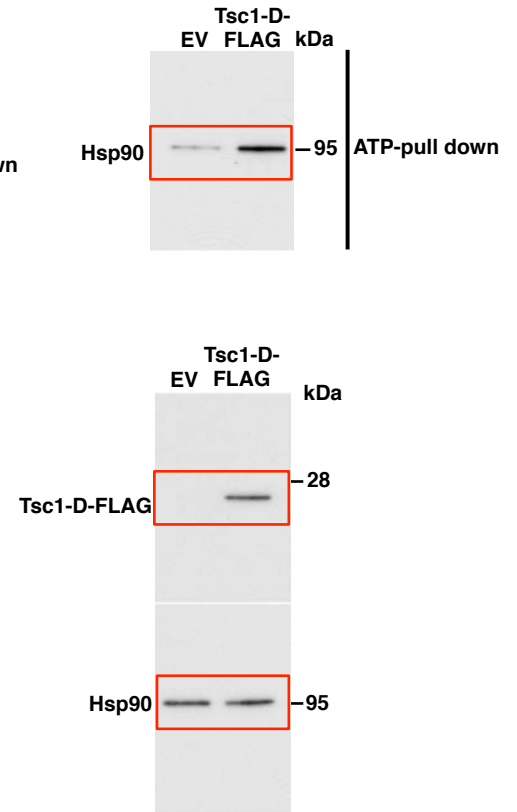

**D**

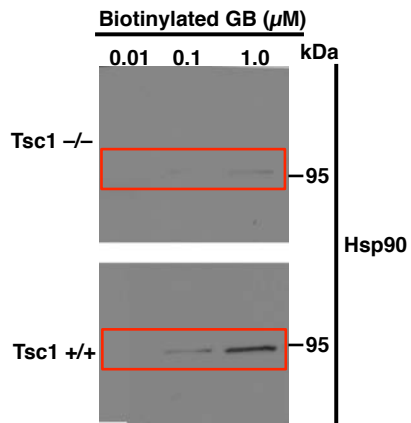

**E**

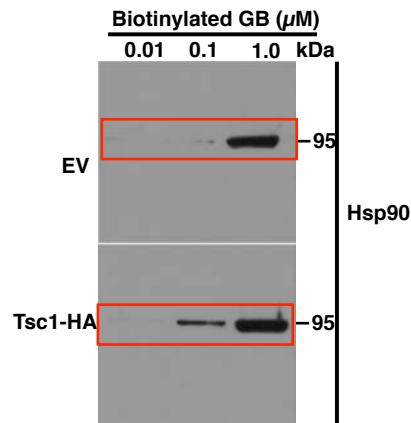

**F**

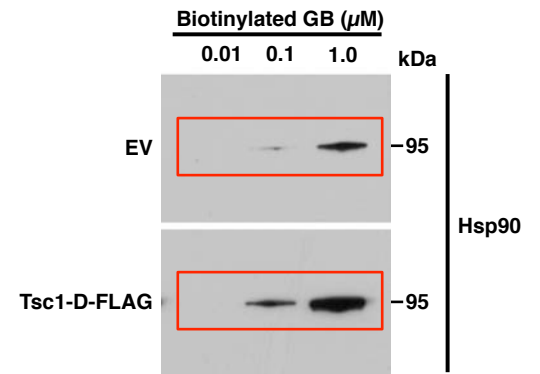

# Source Data Fig 4

## G

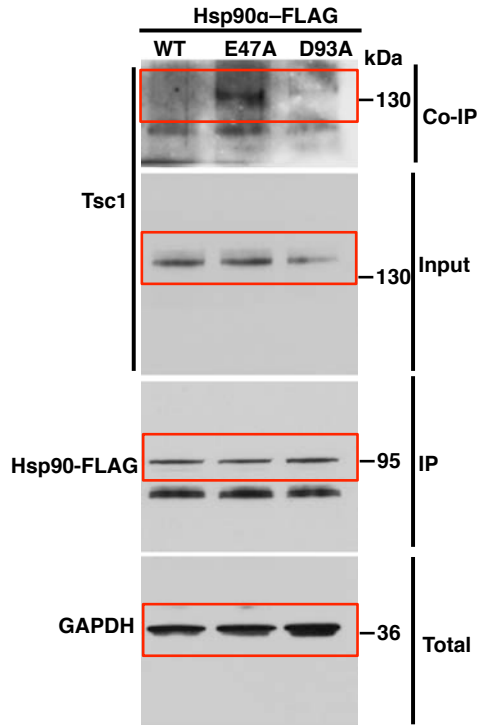

## H

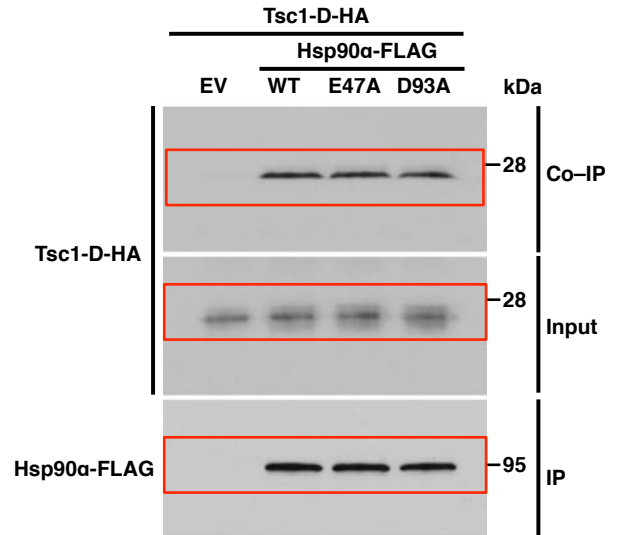

Supplement: EMBJ-36-3650-s006.pdf [file EMBJ-36-3650-s006.pdf]
