# Supplementary material for: Tumor suppressor Tsc1 is a new Hsp90 co‐chaperone that facilitates folding of kinase and non‐kinase clients
Source: PubMed Central journal article supplement (PMC5730846; doi:10.15252/embj.201796700), 2017-11-10

# Source Data Fig 5

**A**

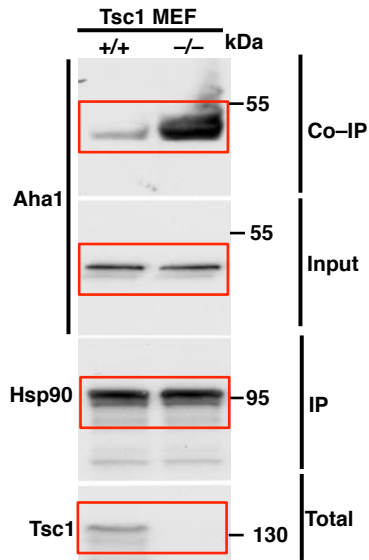

**C**

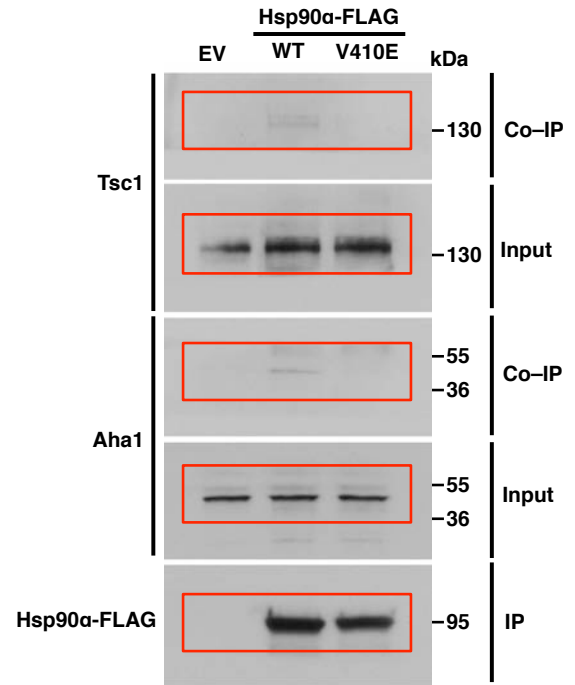

**B**

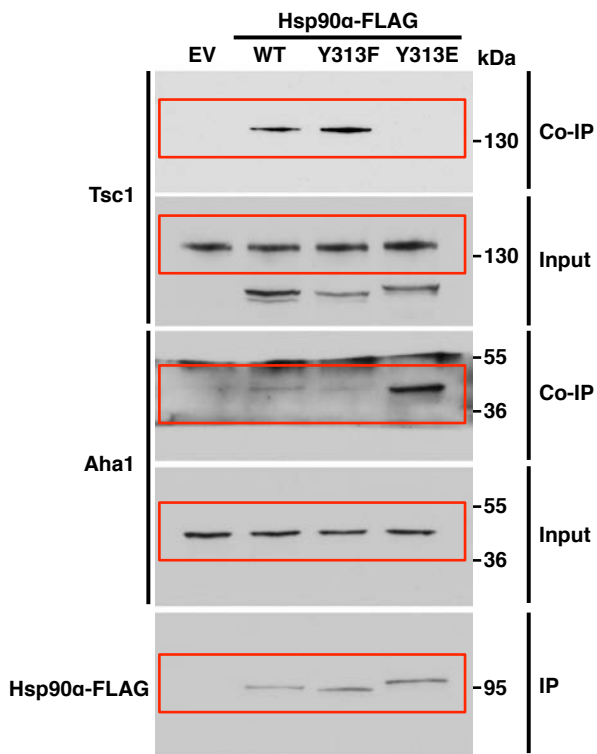

**D**

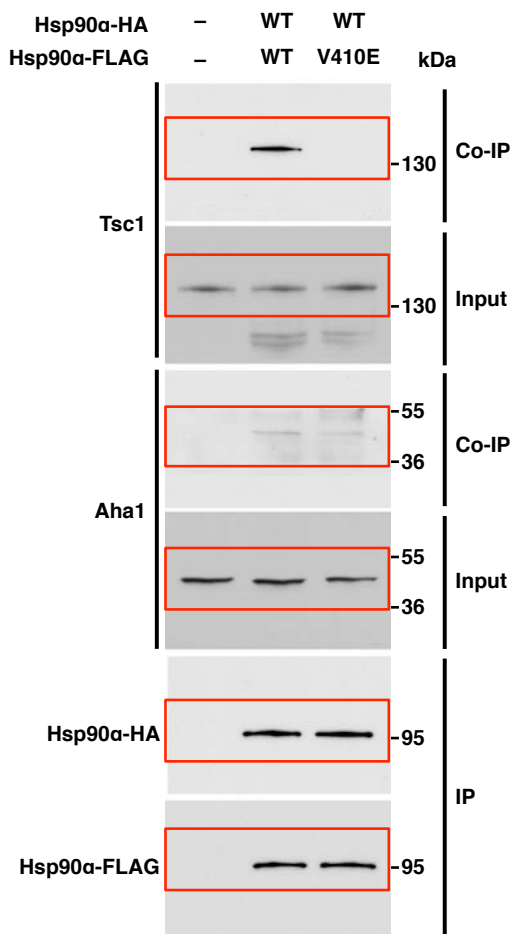

# Source Data Fig 5

**E**

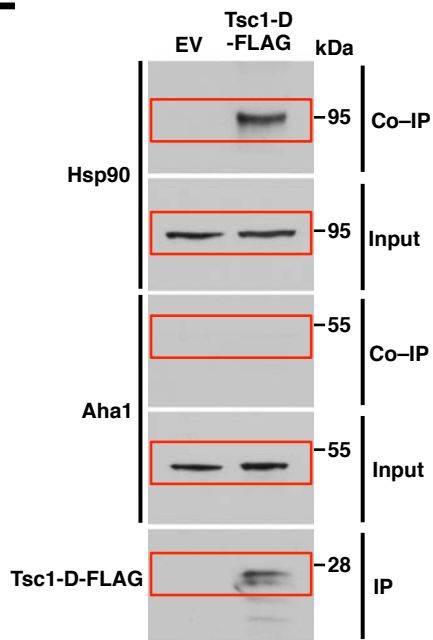

**H**

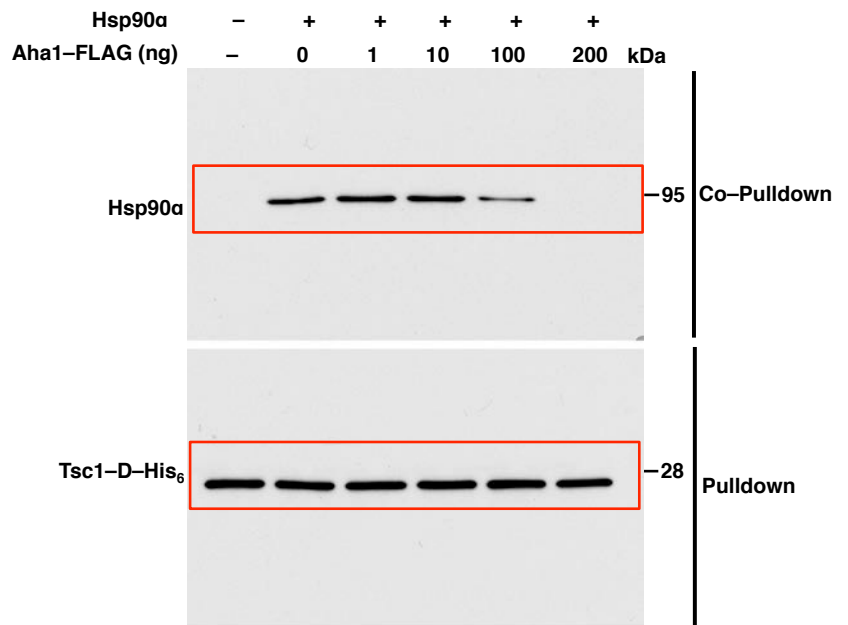

**F**

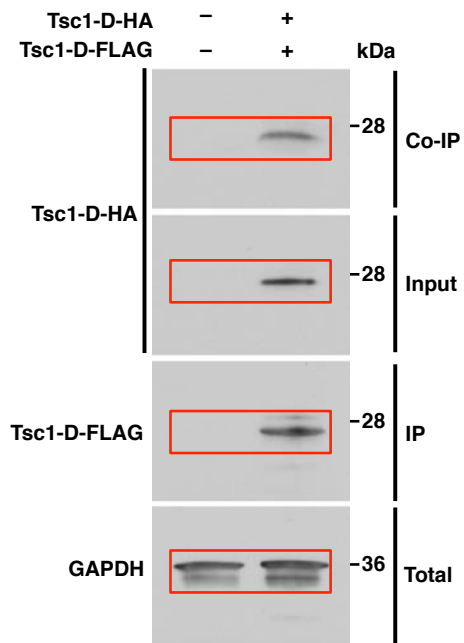

**I**

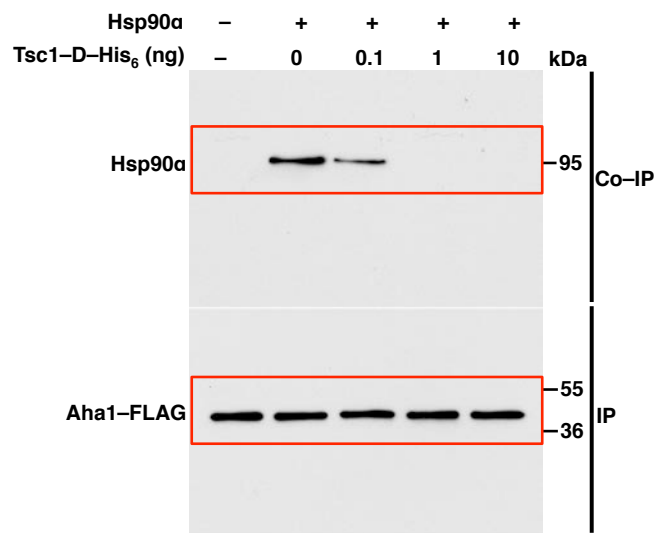

Supplement: EMBJ-36-3650-s007.pdf [file EMBJ-36-3650-s007.pdf]
